# Supplementary material for: Thiosemicarbazone derivatives of nickel and copper: the unprecedented coordination of furan ring in octahedral nickel(ii) and of triphenylphosphine in three-coordinate copper(i) complexes
Source: Royal Society of Chemistry journal article supplement (doi:10.1039/c0dt01291b), 2011-01-01
Supplement: c0dt01291b.pdf [file c0dt01291b.pdf]

## Supplementary

### **Thiosemicarbazone derivatives of nickel and copper: the unprecedented coordination of furan ring in octahedral nickel(II) and of triphenylphosphine in three-coordinate copper(I) complexes**

**Tarlok Singh Lobana,<sup>a\*</sup> Poonam Kumari,<sup>a</sup> Rekha Sharma,<sup>a</sup> Alfonso Castineiras,<sup>b</sup> Ray Jay Butcher,<sup>c</sup> Takashiro Akitsu,<sup>d</sup> Yoshikazu Aritake<sup>d</sup>**

<sup>a</sup> *Department of Chemistry, Guru Nanak Dev University, Amritsar –143 005, India*

<sup>b</sup> *Departamento De Química Inorganica, Facultad de Farmacia, Universidad de Santiago, 15782-Santiago, Spain*

<sup>c</sup> *Department of Chemistry, Howard University, Washington DC 20059, USA*

<sup>d</sup> *Department of Chemistry, Tokyo University of Science, Tokyo –1628601, Japan*

\* To whom correspondence should be addressed. E-mail: [tarlokslobana@yahoo.co.in](mailto:tarlokslobana@yahoo.co.in). (T. S. L.); Fax +91-183-2-258820

#### **Spectroscopy (IR, NMR, UV-vis)**

The ligands show IR bands due to  $\nu(\text{N}^1\text{-H})$  and  $\nu(\text{N}^2\text{-H})$  moieties in the region, 3459–3206  $\text{cm}^{-1}$ . In their respective complexes **1–8**, bands due to  $\nu(\text{N}^1\text{-H})$  appears in the the range, 3408–3357  $\text{cm}^{-1}$ . The  $\nu(\text{N}^2\text{-H})$  bands appear at 3129 and 3119  $\text{cm}^{-1}$  in complexes **7** and **8** while this band disappear in complexes **1–6**. This reveals that the ligands are coordinated to the metal center in the anionic form in complexes **1–6** and in neutral form in complexes **7** and **8**. The diagnostic  $\nu(\text{C-S})$  bands lie in the range, 713–752  $\text{cm}^{-1}$  in the complexes **1–6** and  $\nu(\text{C=S})$  band at 848 and 795  $\text{cm}^{-1}$  in complexes **7** and **8** respectively (cf. free ligands, 819–739  $\text{cm}^{-1}$ ). Other characteristic bands are given in the experimental section.

Free ligands ( $\text{HaftscN-R}^2$ ,  $\text{HattscN-R}^2$ ;  $\text{R}^2 = \text{Me, Et, Ph}$ ) show a signal at low field (8.56–9.40 ppm) due to the presence of hydrazinic proton ( $-\text{N}^2\text{H}-$ ). This signal appears at  $\delta$  11.42 and 11.30 ppm in complexes **7** and **8** respectively, which shows a downfield shift vis-à-vis free ligands which confirmed that thio- ligands are coordinating to Cu in neutral form. Further, the  $^{31}\text{P}$  NMR spectra of complexes **7** and **8** showed one signal at  $\delta$  31.2 and 30.8 ppm respectively, with a coordination shift of  $\Delta\delta$  35.8 (**7**) and 35.4 (**8**) ppm. However this signal is absent in the spectra of complexes **3–6**, thus confirming

deprotonation of these ligands in their respective complexes. Complexes **1–3** are paramagnetic, so their NMR spectra were recorded by opening the window from +100 to -100 ppm. In these complexes, signals show downfield shift relative to their respective ligands, except N<sup>1</sup>H signal (-4.09, **1**; -3.01, **2**; -1.12 ppm, **3**). In complexes **4–8**, signals are well resolved and are given in the experimental section.

In the O, N, S- donor ligand, HaftscN-Me, intense absorption bands at 207, 220 and 314 nm are assigned to  $\pi \rightarrow \pi^*$  and  $n \rightarrow \pi^*$  transitions respectively. These bands in complex **1** appear at 247 and 301 nm. Two bands at 331 and 406 nm are assigned to S $\rightarrow$ Ni charge transfer transitions, while the bands at 671 and 982 nm are assigned to the d-d transitions:  ${}^3A_{2g}(F) \rightarrow {}^3T_{1g}(P)$  and  ${}^3A_{2g}(F) \rightarrow {}^3T_{1g}(F)$  respectively. The various transitions in complexes **2** and **3** are assigned as follows:  $\pi \rightarrow \pi^*$  (248, **2**; 247, **3**),  $n \rightarrow \pi^*$  (301, **2**; 301, **3**), S $\rightarrow$ Ni(CT) (331, 405, **2**; 330, 408 **3**),  ${}^3A_{2g}(F) \rightarrow {}^3T_{1g}(P)$  (675, **2**; 681, **3**) and  ${}^3A_{2g}(F) \rightarrow {}^3T_{1g}(F)$  (983, **2**; 985, **3**) (Table 1). Similarly, in the N, S- donor ligand, HattscN-Me, the  $\pi \rightarrow \pi^*$  (213, 257 nm) shift to 229 nm in square planar complex **4**. The  $n \rightarrow \pi^*$  transition (320 nm in ligand) merges with LMCT (S $\rightarrow$ Ni) +  $\nu_3$ (d-d) transitions and appears as an intense band at 337 nm. A band at 412 nm, attributed to  ${}^1A_{1g} \rightarrow {}^1A_{2g}$  transition, appears as shoulder to main band. Complexes **5** and **6**, have shown similar transitions in the ranges : 212–269 ( $\pi \rightarrow \pi^*$ ), 343 ( $n \rightarrow \pi^*$ , S $\rightarrow$ Ni +  ${}^1A_{1g} \rightarrow {}^1E_g$ ) and 410–415 nm ( ${}^1A_{1g} \rightarrow {}^1A_{2g}$ ) (Table 2).

### IR spectra of the ligands

**HaftscN-Me:** IR (KBr,  $\text{cm}^{-1}$ , selected absorption bands): 3445br ( $\nu(\text{N}^1\text{-H})$ ); 3241s ( $\nu(\text{N}^2\text{-H})$ ); 3051w, 2984w ( $\nu(\text{C-H})$ ); 1555s, 1496s ( $\nu(\text{C=N}) + \nu(\text{C=C})$ ); 1077s, 1047s ( $\nu(\text{C-N})$ ); 739s ( $\nu(\text{C-S})$ ).

**HaftscN-Et:** IR (KBr,  $\text{cm}^{-1}$ , selected absorption bands): 3334br ( $\nu(\text{N}^1\text{-H})$ ); 3272br ( $\nu(\text{N}^2\text{-H})$ ); 2977w, 2940w, 2866w ( $\nu(\text{C-H})$ ); 1539s, 1517s ( $\nu(\text{C=N}) + \nu(\text{C=C})$ );  $\nu(\text{C-N})$ ; 744s ( $\nu(\text{C-S})$ ).

**HaftscN-Ph:** IR (KBr,  $\text{cm}^{-1}$ , selected absorption bands): 3459s ( $\nu(\text{N}^1\text{-H})$ ); 3341s ( $\nu(\text{N}^2\text{-H})$ ); 3155w, 3103w, 2835w ( $\nu(\text{C-H})$ ); 1558s, 1526s ( $\nu(\text{C=N}) + \nu(\text{C=C})$ ); 1068s, 1018s, 934s ( $\nu(\text{C-N})$ ); 757s ( $\nu(\text{C-S})$ ).

**HattscN-Me:** IR (KBr,  $\text{cm}^{-1}$ , selected absorption bands): 3446br ( $\nu(\text{N}^1\text{-H})$ ); 3385s ( $\nu(\text{N}^2\text{-H})$ ); 2989w, 2931w ( $\nu(\text{C-H})$ ); 1558s, 1542s ( $\nu(\text{C=N}) + \nu(\text{C=C})$ ); 1053s, 1035s, 959s ( $\nu(\text{C-N})$ ); 819s ( $\nu(\text{C-S})$ ).

**HattscN-Et:** IR (KBr,  $\text{cm}^{-1}$ , selected absorption bands): 3358br ( $\nu(\text{N}^1\text{-H})$ ); 3206s ( $\nu(\text{N}^2\text{-H})$ ); 3128w, 2962w, 2882w ( $\nu(\text{C-H})$ ); 1596s, 1517s ( $\nu(\text{C=N}) + \nu(\text{C=C})$ ); 1096s, 1053s, 967s ( $\nu(\text{C-N})$ ); 811s ( $\nu(\text{C-S})$ ).

**HattscN-Ph:** IR (KBr,  $\text{cm}^{-1}$ , selected absorption bands): 3390br ( $\nu(\text{N}^1\text{-H})$ ); 3248s ( $\nu(\text{N}^2\text{-H})$ ); 3052w, 2906w ( $\nu(\text{C-H})$ ); 1587s, 1531s ( $\nu(\text{C=N}) + \nu(\text{C=C})$ ); 1047s, 1027s ( $\nu(\text{C-N})$ ); 817s ( $\nu(\text{C-S})$ ).

**$^1\text{H}$  NMR spectra of ligands:** **HattscN-Me,**  $^1\text{H}$  NMR ( $\delta$ ,  $\text{CDCl}_3$ ):  $\delta$  8.62 (1H, s,  $\text{N}^2\text{H}$ ), 7.66 (1H, s, br,  $\text{N}^1\text{H}$ ), 7.48 (1H, dd,  $\text{C}^6\text{H}$ ), 6.73 (1H, dd,  $\text{C}^4\text{H}$ ), 6.47 (1H, q,  $\text{C}^5\text{H}$ ), 3.25 (3H, t,  $\text{CH}_3(\text{C}^2)$ ), 2.21 (3H, d,  $\text{CH}_3(\text{N}^1)$ ) ppm. **HattscN-Et,**  $^1\text{H}$  NMR ( $\delta$ ,  $\text{CDCl}_3$ ):  $\delta$  8.56 (1H, s,  $\text{N}^2\text{H}$ ), 7.66 (1H, s, br,  $\text{N}^1\text{H}$ ), 7.59 (1H, d,  $\text{C}^6\text{H}$ ), 6.72 (1H, s,  $\text{C}^4\text{H}$ ), 6.47 (1H, dd,  $\text{C}^5\text{H}$ ), 3.72 (2H, m,  $\text{CH}_2$ ), 2.20 (3H, d,  $\text{CH}_3(\text{C}^2)$ ), 1.69 (s, 3H,  $\text{CH}_3(\text{N}^1)$ ) ppm. **HattscN-Ph,**  $^1\text{H}$  NMR ( $\delta$ ,  $\text{CDCl}_3$ ):  $\delta$  9.40 (1H, s,  $\text{N}^2\text{H}$ ), 8.71 (1H, s,  $\text{N}^1\text{H}$ ), 7.69 (2H, m, *o*-H(Ph)), 7.52 (1H, dd, *p*-H(Ph)), 7.40 (1H, m, *m*-H(Ph)), 7.24 (2H, dd,  $\text{C}^6\text{H}$ ), 6.79 (1H, dd,  $\text{C}^4\text{H}$ ), 6.54 (1H, dd,  $\text{C}^5\text{H}$ ), 2.35 (3H, s,  $\text{CH}_3(\text{C}^2)$ ) ppm. **HattscN-Me,**  $^1\text{H}$  NMR ( $\delta$ ,  $\text{CDCl}_3$ ):  $\delta$  8.59 (1H, s,  $\text{N}^2\text{H}$ ), 7.52 (1H, s, br,  $\text{N}^1\text{H}$ ), 7.34 (1H, dd,  $\text{C}^6\text{H}$ ), 7.29 (1H, dd,  $\text{C}^4\text{H}$ ), 7.03 (1H, q,  $\text{C}^5\text{H}$ ), 3.27 (3H, t,  $\text{CH}_3(\text{C}^2)$ ), 2.28 (3H, d,  $\text{CH}_3(\text{N}^1)$ ) ppm. **HattscN-Et,**  $^1\text{H}$  NMR ( $\delta$ ,  $\text{CDCl}_3$ ):  $\delta$  8.56 (1H, s,  $\text{N}^2\text{H}$ ), 7.47 (1H, s, br,  $\text{N}^1\text{H}$ ), 7.33 (1H, dd,  $\text{C}^6\text{H}$ ), 7.29 (1H, m,  $\text{C}^4\text{H}$ ), 7.03 (1H, m,  $\text{C}^5\text{H}$ ), 3.76 (2H, m,  $\text{CH}_2$ ), 2.25 (3H, d,  $\text{CH}_3(\text{C}^2)$ ), 1.34 (3H, s,  $\text{CH}_3(\text{N}^1)$ ) ppm. **HattscN-Ph,**  $^1\text{H}$  NMR ( $\delta$ ,  $\text{CDCl}_3$ ):  $\delta$  9.30 (1H, s,  $\text{N}^2\text{H}$ ), 8.69 (1H, s,  $\text{N}^1\text{H}$ ), 7.71 (1H, d,  $\text{C}^6\text{H}$ ), 7.69 ((1H, d,  $\text{C}^4\text{H}$ ), 7.39 (3H, m, *o*-H+ *p*-H(Ph)), 7.23 (1H, t, *m*-H(Ph)), 7.06 (1H, q,  $\text{C}^5\text{H}$ ), 2.31 (3H, d,  $\text{CH}_3(\text{C}^2)$ ) ppm.

**Table 1.** Electronic spectral data:  $\lambda_{\max/\text{nm}}$  ( $\epsilon$  /L mol<sup>-1</sup> cm<sup>-1</sup>)<sup>a</sup>

| Compound                                            | $\pi \rightarrow \pi^*$ | $n \rightarrow \pi^*$ | LMCT(S $\rightarrow$ Ni) | d-d       |
|-----------------------------------------------------|-------------------------|-----------------------|--------------------------|-----------|
| [Ni(aftscN-Me) <sub>2</sub> ] <sup>a</sup> <b>1</b> | 247(19520)              | 301(20980)            | 331(19940)               | 671 (510) |
|                                                     |                         |                       | 406(23680)               | 982 (540) |
| [Ni(aftscN-Et) <sub>2</sub> ] <sup>a</sup> <b>2</b> | 248(19430)              | 301(20950)            | 331(19930)               | 675 (380) |
|                                                     |                         |                       | 405 (23730)              | 983 (410) |
| [Ni(aftscN-Ph) <sub>2</sub> ] <sup>a</sup> <b>3</b> | 247(19410)              | 301(21000)            | 330 (19950)              | 681(360)  |
|                                                     |                         |                       | 408 (23810)              | 985(400)  |

<sup>a</sup> 10<sup>-4</sup>M in CH<sub>3</sub>OH

HaftscN-Me<sup>a</sup>: 207(7080), 220 (4500)  $\pi \rightarrow \pi^*$ , 314(18540)  $n \rightarrow \pi^*$

HaftscN-Et<sup>a</sup>: 208(7310), 233 (4340)  $\pi \rightarrow \pi^*$ , 314(18100)  $n \rightarrow \pi^*$

HaftscN-Ph<sup>a</sup>: 209(11140), 240 (7500)  $\pi \rightarrow \pi^*$ , 320(18570)  $n \rightarrow \pi^*$

**Table 2.** Electronic spectral data:  $\lambda_{\max/\text{nm}}$  ( $\epsilon$  /L mol<sup>-1</sup> cm<sup>-1</sup>)<sup>a</sup>

| Compound                                            | $\pi \rightarrow \pi^*$ | $n \rightarrow \pi^*$ + LMCT<br>(S $\rightarrow$ Ni) + $\nu_3$ (d-d) | $\nu_2$ (d-d) |
|-----------------------------------------------------|-------------------------|----------------------------------------------------------------------|---------------|
| [Ni(attscN-Me) <sub>2</sub> ] <sup>a</sup> <b>4</b> | 229(10970)              | 337(12750)                                                           | 412 (4000)    |
|                                                     | 270 (11000)             |                                                                      |               |
| [Ni(attscN-Et) <sub>2</sub> ] <sup>a</sup> <b>5</b> | 231(11800)              | 343(14080)                                                           | 410 (4000)    |
|                                                     | 269(12550)              |                                                                      |               |
| [Ni(attscN-Ph) <sub>2</sub> ] <sup>a</sup> <b>6</b> | 212 (15010)             | 343(18940)                                                           | 415 (5200)    |
|                                                     | 264 (22820)             |                                                                      |               |

<sup>a</sup> 10<sup>-4</sup>M in CH<sub>3</sub>OH,

HattscN-Me<sup>a</sup>: 213(12050), 257(10020) sh  $\pi \rightarrow \pi^*$ , 320(24530)  $n \rightarrow \pi^*$

HattscN-Et<sup>a</sup>: 212(3990), 260 sh(3590)  $\pi \rightarrow \pi^*$ , 328(8990)  $n \rightarrow \pi^*$

HattscN-Ph<sup>b</sup>: 268 sh (8210)  $\pi \rightarrow \pi^*$ , 336(8210)  $n \rightarrow \pi^*$

<sup>b</sup> 10<sup>-4</sup> M in DMSO

Melting Points of complexes: m. p. 220-222 °C (**1**), 228-230 °C (**2**), 234-236 °C (**3**), 215-216 °C (**4**), 210-212 °C (**5**), 155-160 °C (**6**)

## Crystal structure

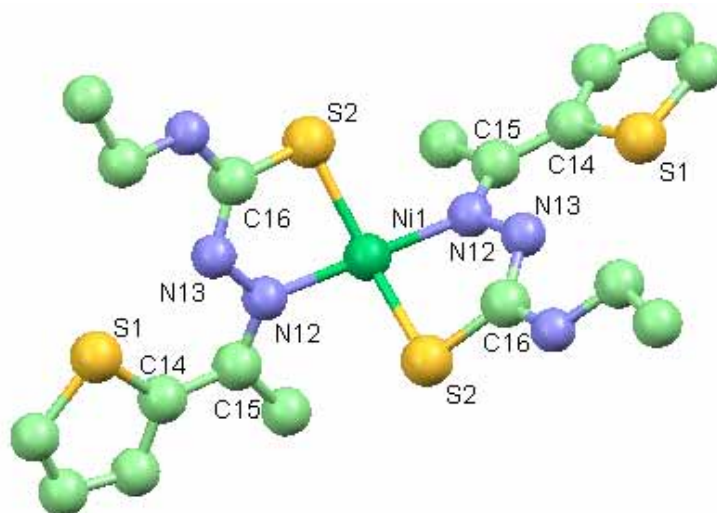

**Fig. 1** Molecular structure of complex  $[\text{Ni}(\text{attsN-Et})_2]$  **5**

## Packing Interactions

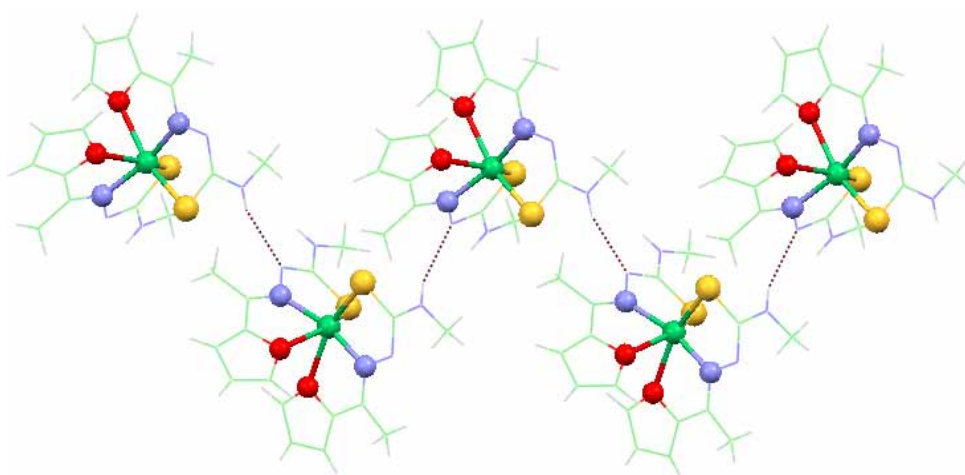

**Fig. 2** Packing diagram of complex **1**, showing interaction,  $\{\text{N}^2 \cdots \text{H}(\text{N}^1), 2.33 \text{ \AA}\}$  in 1D chain

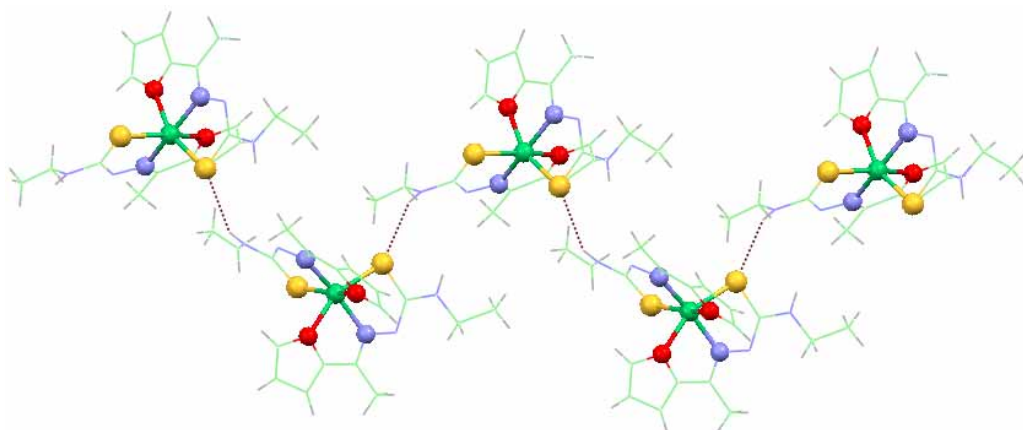

**Fig. 3** Packing diagram of complex **2**, showing interaction, {C-S $\cdots$ H(N<sup>1</sup>), 2.73 Å} in 1D chain

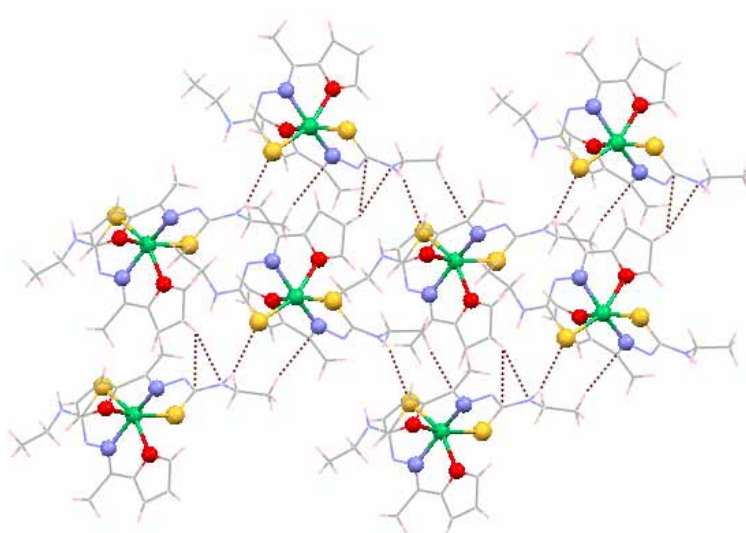

**Fig. 4** Packing diagram of complex **2**, showing 2D network

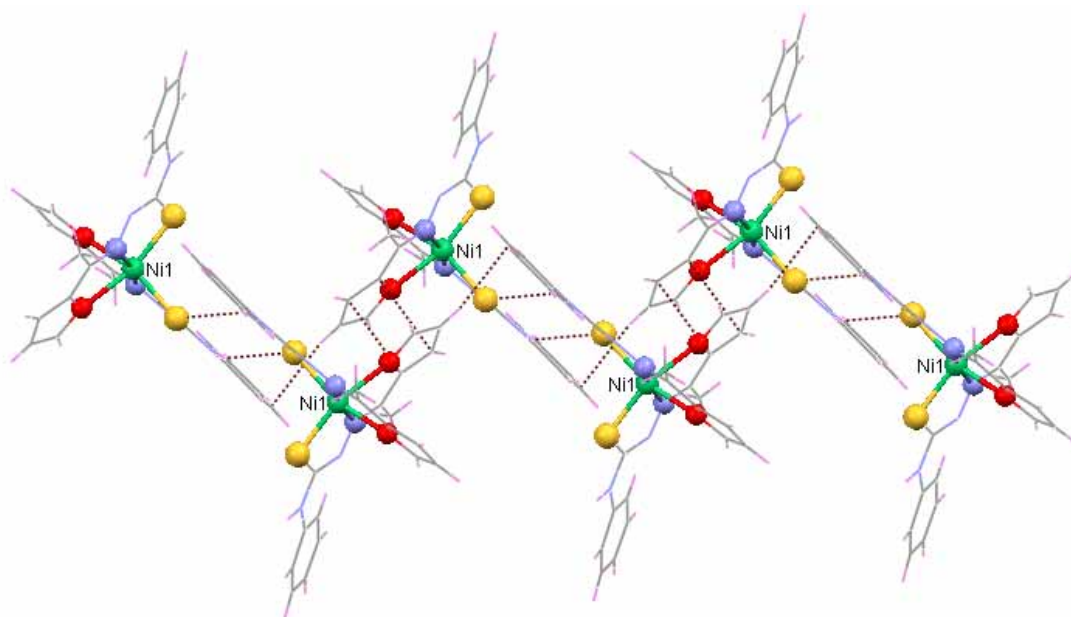

**Fig. 5** Packing interactions in **3**, showing intermolecular interactions of type 1 molecules, {C-S...HN<sup>1</sup>, 2.734, (furan)C-H...π(ph), 2.837, (furan)π...π(furan) 3.318 Å} in 1D chain

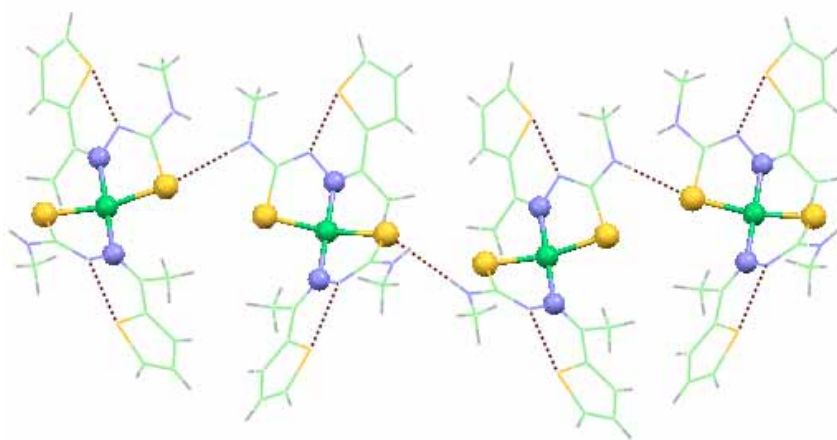

**Fig. 6** Packing diagram of complex **4**, showing intramolecular, {C<sub>4</sub>H<sub>3</sub>S...N<sup>2</sup>, 2.63 Å} and intermolecular interactions, {C-S...HN<sup>1</sup>, 2.73 Å} in 1D chain

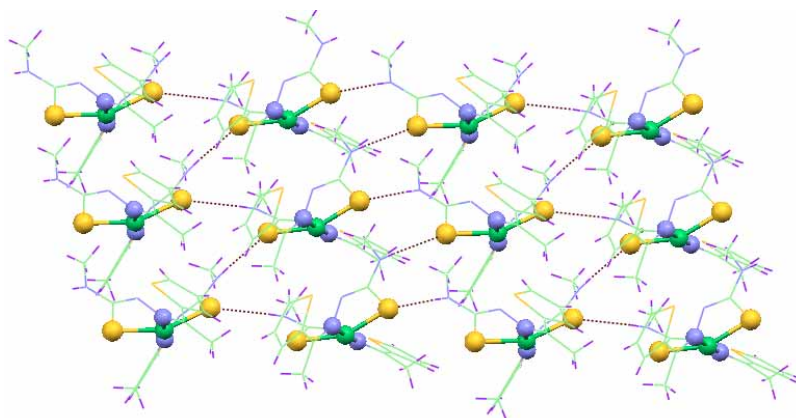

**Fig. 7** Packing diagram of complex **4** showing 2D network

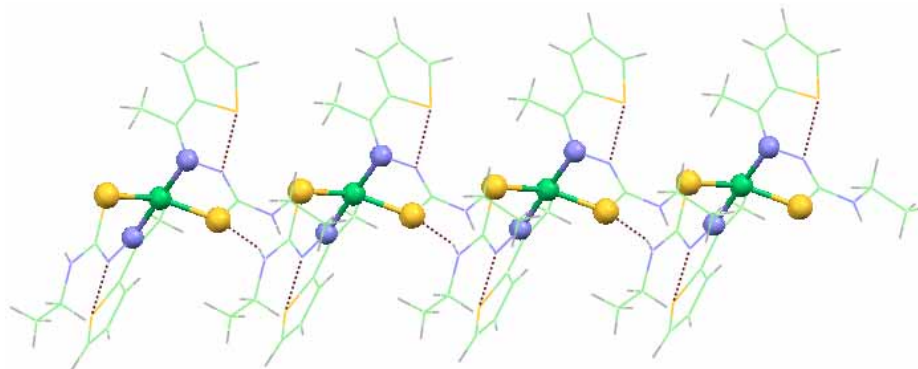

**Fig. 8** Packing diagram of complex **5**, showing intramolecular,  $\{C_4H_3S \cdots N^2, 2.65 \text{ \AA}\}$  and intermolecular interactions,  $\{C-S \cdots HN^1, 2.82 \text{ \AA}\}$  in 1D chain

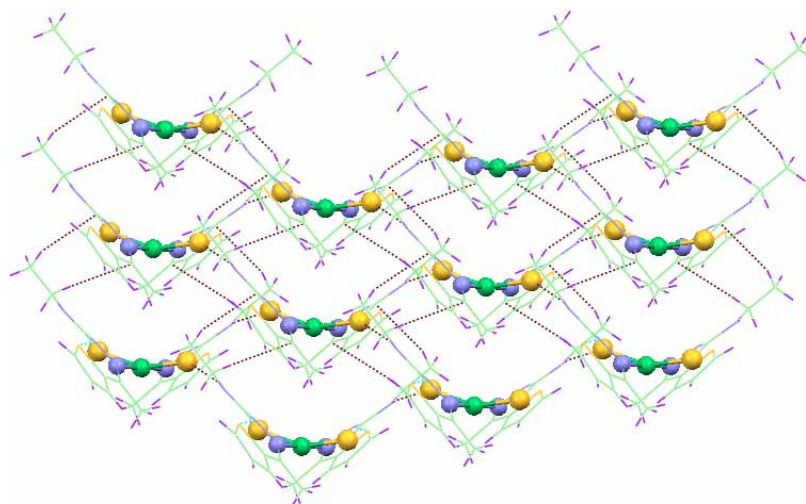

**Fig. 9** Packing diagram of complex **5**, showing 2D network



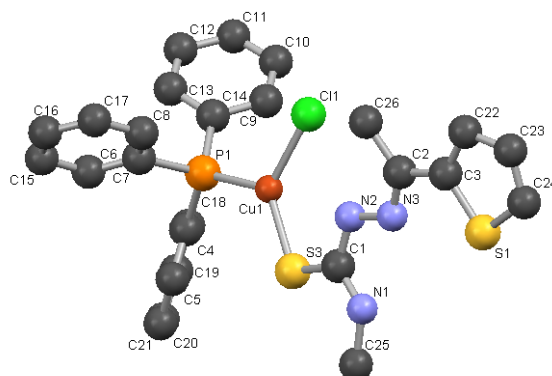

**Fig. 10** Molecular structure of complex  $[\text{CuCl}(\eta^1\text{-S-HattscN-Me})(\text{Ph}_3\text{P})]$  **8**

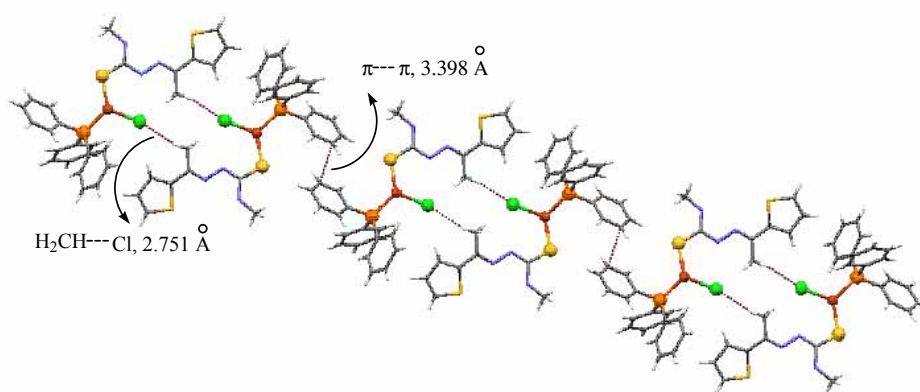

**Fig. 11** Packing diagram of complex **8**

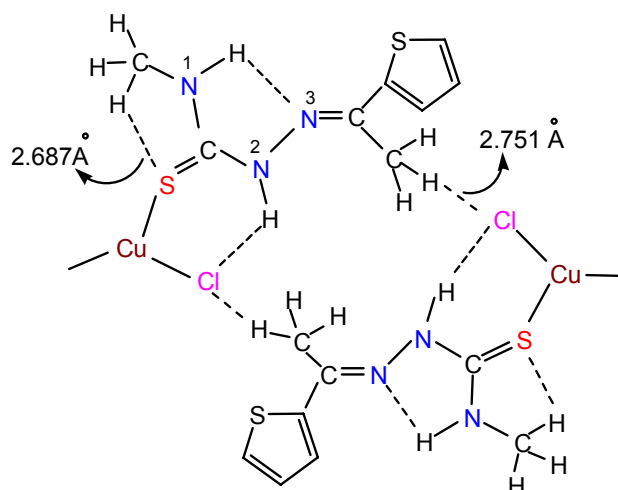

**Scheme 1.** Various intra- and inter-molecular interactions of  $[\text{CuCl}(\eta^1\text{-S-HattscN-Me})(\text{Ph}_3\text{P})]$  **8**

**Table 3.** (C<sup>2</sup> methyl)C-H···H-C(furan) interactions in ligand (Haftsc-N-Me) according to our Chem. Draw Schemes are given below according to their X-ray structures of complexes (1–3)

|             |                                                                                                                                                                                                            |
|-------------|------------------------------------------------------------------------------------------------------------------------------------------------------------------------------------------------------------|
| Haftsc-N-Me | 2.110 Å (C <sup>4</sup> -H···H-C <sup>6</sup> )                                                                                                                                                            |
| <b>1</b>    | 2.513 Å (C <sup>28</sup> -H···H-C <sup>23</sup> ), 2.390 Å (C <sup>18</sup> -H···H-C <sup>13</sup> )                                                                                                       |
| <b>2</b>    | 2.538 Å (C <sup>20</sup> -H···H-C <sup>14</sup> ), 2.457 Å (C <sup>30</sup> -H···H-C <sup>24</sup> ), 2.559 Å (C <sup>40</sup> -H···H-C <sup>34</sup> ), 2.391 Å (C <sup>50</sup> -H···H-C <sup>44</sup> ) |
| <b>3</b>    | 2.342 Å (C <sup>150</sup> -H···H-C <sup>13</sup> ), 2.430 Å (C <sup>250</sup> -H···H-C <sup>23</sup> ), 2.450 Å (C <sup>350</sup> -H···H-C <sup>33</sup> )                                                 |

**Table 4.** Hydrogen Bonds (Å)

|                                                        |      |                                                          |      |
|--------------------------------------------------------|------|----------------------------------------------------------|------|
| <b>Complex 1</b>                                       |      |                                                          |      |
| N <sup>2</sup> ···H-N <sup>1</sup>                     | 2.33 |                                                          |      |
| (furan)C-H···S-C                                       | 2.85 | (furan)C-H···N <sup>2</sup>                              | 2.58 |
| <b>Complex 2</b>                                       |      |                                                          |      |
| C-S···H-N <sup>1</sup>                                 | 2.73 |                                                          |      |
| (furan)C-H···S-C                                       | 2.81 | (furan)C-H···N <sup>1</sup>                              | 2.72 |
| <b>Complex 3</b>                                       |      |                                                          |      |
| C-S···H-N <sup>1</sup>                                 | 2.73 | (furan)C-H···□(ph)                                       | 2.84 |
| (furan)□···□(furan)                                    | 3.32 | (furan)C-H···□(ph)                                       | 3.00 |
| H-N <sup>1</sup> ···HCH <sub>2</sub> (C <sup>2</sup> ) | 2.62 | C-S···HCH <sub>2</sub> (C <sup>2</sup> )                 | 2.83 |
| (Ph)C-H···□(ph)                                        | 2.86 | (ph)C-H···N <sup>2</sup>                                 | 2.66 |
| C-S···HN <sup>1</sup>                                  | 2.66 |                                                          |      |
| <b>Complex 4</b>                                       |      |                                                          |      |
| S···N <sup>2</sup>                                     | 2.63 | C-S···H(N <sup>1</sup> )                                 | 2.73 |
| <b>Complex 5</b>                                       |      |                                                          |      |
| S···N <sup>2</sup>                                     | 2.65 | C-S···H(N <sup>1</sup> )                                 | 2.82 |
| C <sup>2</sup> ···HCH(N <sup>1</sup> )                 | 2.85 | C-S···HCH <sub>2</sub> CH <sub>2</sub> (N <sup>1</sup> ) | 2.83 |

**Table 5.** Selected bond lengths (Å) and bond angles (°) of complexes 1–5, 7 and 8

| <b>Complex 1</b>  |           |                   |           |
|-------------------|-----------|-------------------|-----------|
| Ni(1)-N(12)       | 2.016(12) | Ni(1)-S(1)        | 2.313(4)  |
| Ni(1)-O(11)       | 2.358(11) | Ni(1)-N(22)       | 2.018(12) |
| Ni(1)-S(2)        | 2.313(4)  | Ni(1)-O(21)       | 2.319(10) |
| C(16)-S(1)        | 1.738(15) | C(26)-S(2)        | 1.748(16) |
| C(15)-N(12)       | 1.299(19) | C(25)-N(22)       | 1.305(19) |
| O(21)-Ni(1)-N(22) | 74.70(4)  | N(22)-Ni(1)-S(2)  | 83.79(4)  |
| S(1)-Ni(1)-N(12)  | 83.52(4)  | N(12)-Ni(1)-O(11) | 74.30(4)  |

|                             |            |                   |             |
|-----------------------------|------------|-------------------|-------------|
| O(21)-Ni(1)-O(11)           | 73.26(4)   | S(2)-Ni(1)-S(1)   | 100.71(15)  |
| N(22)-Ni(1)-N(12)           | 162.01(5)  | O(21)-Ni(1)-S(2)  | 158.04(3)   |
| O(11)-Ni(1)-S(1)            | 150.94(3)  |                   |             |
| <b>Complex 2</b>            |            |                   |             |
| One independent molecule    |            |                   |             |
| Ni(1)-N(12)                 | 2.032(3)   | Ni(1)-S(1)        | 2.3109(10)  |
| Ni(1)-O(11)                 | 2.284(3)   | Ni(1)-N(22)       | 1.990(3)    |
| Ni(1)-S(2)                  | 2.2902(11) | Ni(1)-O(21)       | 2.341(3)    |
| C(17)-S(1)                  | 1.736(4)   | C(27)-S(2)        | 1.757(4)    |
| C(16)-N(12)                 | 1.245(4)   | C(26)-N(22)       | 1.346(5)    |
| O(21)-Ni(1)-N(22)           | 91.37(11)  | N(22)-Ni(1)-S(2)  | 84.00(10)   |
| S(1)-Ni(1)-N(12)            | 84.56(8)   | N(12)-Ni(1)-O(11) | 74.97(10)   |
| O(21)-Ni(1)-O(11)           | 79.89(10)  | S(2)-Ni(1)-S(1)   | 102.21(4)   |
| N(22)-Ni(1)-N(12)           | 161.99(11) | O(21)-Ni(1)-S(2)  | 157.54(7)   |
| O(11)-Ni(1)-S(1)            | 157.78(8)  |                   |             |
| Second independent molecule |            |                   |             |
| Ni(2)-N(32)                 | 2.052(3)   | Ni(2)-S(3)        | 2.3163(10)  |
| Ni(2)-O(31)                 | 2.339(3)   | Ni(2)-N(42)       | 2.028(4)    |
| Ni(2)-S(4)                  | 2.3348(11) | Ni(2)-O(41)       | 2.202(3)    |
| C(37)-S(3)                  | 1.753(4)   | C(47)-S(4)        | 1.700(4)    |
| C(36)-N(32)                 | 1.306(5)   | C(46)-N(42)       | 1.276(5)    |
| O(31)-Ni(2)-N(32)           | 75.50(12)  | N(32)-Ni(2)-S(3)  | 84.04(10)   |
| S(4)-Ni(2)-N(42)            | 83.42(10)  | N(42)-Ni(2)-O(41) | 75.03(13)   |
| O(41)-Ni(2)-O(31)           | 79.89(11)  | S(3)-Ni(2)-S(4)   | 101.41(4)   |
| N(42)-Ni(2)-N(32)           | 160.84(13) | O(41)-Ni(2)-S(4)  | 157.69(8)   |
| O(31)-Ni(2)-S(3)            | 157.36(8)  |                   |             |
| <b>Complex 3</b>            |            |                   |             |
| One independent molecule    |            |                   |             |
| Ni(1)-N(12)                 | 2.0192(14) | Ni(1)-S(1)        | 2.3024(5)   |
| Ni(1)-O(11)                 | 2.3525(12) | Ni(1)-N(22)       | 2.0068(14)  |
| Ni(1)-S(2)                  | 2.3089(5)  | Ni(1)-O(21)       | 2.2588(12)  |
| C(16)-S(1)                  | 1.7346(1)  | C(26)-S(2)        | 1.7497(17)  |
| C(15)-N(12)                 | 1.300(2)   | C(25)-N(22)       | 1.303(2)    |
| O(21)-Ni(1)-N(22)           | 75.12(5)   | N(22)-Ni(1)-S(2)  | 83.60(4)    |
| S(1)-Ni(1)-N(12)            | 83.82(4)   | N(12)-Ni(1)-O(11) | 73.95(5)    |
| O(21)-Ni(1)-O(11)           | 80.12(4)   | S(2)-Ni(1)-S(1)   | 101.261(18) |
| N(22)-Ni(1)-N(12)           | 164.43(6)  | O(21)-Ni(1)-S(2)  | 155.63(4)   |
| S(1)-Ni(1)-O(11)            | 157.10(3)  |                   |             |
| Second independent molecule |            |                   |             |
| Ni(2)-N(32)                 | 2.0194(14) | Ni(2)-S(3)        | 2.3105(5)   |
| Ni(2)-O(31)                 | 2.2964(13) | C(36)-S(3)        | 1.7505(17)  |

|                   |            |                   |            |
|-------------------|------------|-------------------|------------|
| C(35)-N(32)       | 1.301(2)   |                   |            |
| O(31)-Ni(2)-N(32) | 75.09(5)   | N(32)-Ni(2)-S(3)  | 83.52(4)   |
| N(32)-Ni(2)-S(3)  | 83.52(4)   | O(31)-Ni(2)-N(32) | 86.14(5)   |
| O(31)-Ni(2)-O(31) | 77.94(7)   | S(3)-Ni(2)-S(3)   | 100.32(3)  |
| N(32)-Ni(1)-N(32) | 155.90(9)  | O(31)-Ni(2)-S(3)  | 157.55(3)  |
| <b>Complex 4</b>  |            |                   |            |
| Ni(1)-N(12)       | 1.912(2)   | Ni(1)-S(1)        | 2.1950(8)  |
| C(16)-S(1)        | 1.753(3)   | C(15)-N(12)       | 1.312(4)   |
| N(12)-Ni(1)-S(1)  | 93.88(7)   | N(12)-Ni(1)-S(1)  | 85.32(8)   |
| N(12)-Ni(1)-N(12) | 176.3(2)   | S(1)-Ni(1)-S(1)   | 155.40(6)  |
| <b>Complex 5</b>  |            |                   |            |
| Ni(1)-N(12)       | 1.898(3)   | Ni(1)-S(1)        | 2.204(9)   |
| C(16)-S(2)        | 1.737(4)   | C(15)-N(12)       | 1.314(5)   |
| N(12)-Ni(1)-S(2)  | 94.82(9)   | N(12)-Ni(1)-S(2)  | 84.80(9)   |
| N(12)-Ni(1)-N(12) | 178.3(2)   | S(1)-Ni(1)-S(2)   | 154.47(6)  |
| <b>Complex 7</b>  |            |                   |            |
| Cu(1)-S(2)        | 2.218(11)  | Cu(1)-P(1)        | 2.223(10)  |
| Cu(1)-Br(1)       | 2.373(6)   | S(2)-C(19)        | 1.721(4)   |
| C(19)-N(2)        | 1.334(5)   | N(2)-N(3)         | 1.387(4)   |
| S(2)-Cu(1)-P(1)   | 125.98(4)  | S(2)-Cu(1)-Br(1)  | 122.37(3)  |
| P(1)-Cu(1)-Br(1)  | 111.53(3)  | C(19)-S(2)-Cu(1)  | 111.44(13) |
| <b>Complex 8</b>  |            |                   |            |
| Cu(1)-S(3)        | 2.2244(9)  | Cu(1)-P(1)        | 2.2161(8)  |
| Cu(1)-Cl(1)       | 2.2373(10) | S(3)-C(1)         | 1.713(3)   |
| P(1)-Cu(1)-Cl(1)  | 114.99(4)  | S(3)-Cu(1)-Cl(1)  | 120.27(4)  |
| P(1)-Cu(1)-S(3)   | 124.61(3)  | C(1)-S(3)-Cu(1)   | 110.69(11) |

The single crystal of compound (HaftscN-Me) was mounted on Xcalibur, Ruby, Gemini diffractometer, equipped with a graphite monochromator and Mo-K $\alpha$  radiation ( $\lambda = 0.71073 \text{ \AA}$ ). The unit cell dimensions and intensity data were measured at 123(2) K.

**Table 6.** Crystallographic data of ligand HaftscN-Me

|                                          | <b>HaftscN-Me</b>                                                            |
|------------------------------------------|------------------------------------------------------------------------------|
| Empirical formula                        | C <sub>16</sub> H <sub>24</sub> N <sub>6</sub> O <sub>3</sub> S <sub>2</sub> |
| M                                        | 412.53                                                                       |
| T(K)                                     | 123(2)                                                                       |
| Crystal system                           | Orthorhombic                                                                 |
| Space group                              | P b c n                                                                      |
| a(Å)                                     | 13.1262(4)                                                                   |
| b(Å)                                     | 7.4010(2)                                                                    |
| c(Å)                                     | 20.7051(5)                                                                   |
| α(°)                                     | 90.00                                                                        |
| β(°)                                     | 90.00                                                                        |
| γ(°)                                     | 90.00                                                                        |
| V(Å <sup>3</sup> )                       | 2011.43(9)                                                                   |
| Z                                        | 4                                                                            |
| D <sub>calcd</sub> (g cm <sup>-3</sup> ) | 1.362                                                                        |
| μ(mm <sup>-1</sup> )                     | 0.294                                                                        |
| Reflections collected                    | 10754                                                                        |
| Independent reflections                  | 3407 [R(int)= 0.0281]                                                        |
| final R indices[I>2σ(I)]                 | R1= 0.0392, wR2= 0.1061                                                      |
